# Supplementary material for: Effects of microgravity on osteoblast mitochondria: a proteomic and metabolomics profile
Source: PubMed Central journal article supplement (PMC5684136; doi:10.1038/s41598-017-15612-1), 2017-11-13
Supplement: 41598_2017_15612_MOESM1_ESM.pdf [file 41598_2017_15612_MOESM1_ESM.pdf]

1 **Effects of microgravity on osteoblast mitochondria: a proteomic and metabolomics profile**

2 **Anna Michaletti<sup>1</sup>, Magda Gioia<sup>2</sup>, Umberto Tarantino<sup>2</sup> and Lello Zolla<sup>1\*</sup>**

3 1 Department of Ecological and Biological Sciences, University of Tuscia, Viterbo, Italy.

4 2 Department of Clinical Medicine and Translational Science, University of Rome Tor Vergata, Rome Italy.

5 \* Corresponding author:

6 Lello Zolla: [zolla@unitus.it](mailto:zolla@unitus.it)

7

8 **Supplementary methods**

9 **Isolation and Culture of Primary Human OB Cells**

10 Primary cultures of osteoblasts were isolated from the cancellous bone of health patients with high-energy  
11 femoral fracture. The bone tissue was minced, thoroughly washed to remove any remaining soft tissue, and  
12 placed in 6-well plates to initiate explant cultures. The culture medium consisted of DMEM/F12 (DMEM  
13 w/o L- glutamine w/ 25mM Hepes, Biowest, Nuaille, FR.) supplemented with 15% FBS, 50 µg/mL  
14 gentamicin and 0.08% FungizoneR, penicillin streptomycin (sigma Chemical Co., St Louis, MO, USA),  
15 amphotericin B (biowest) and was changed twice per week). Cells were treated to select and isolate  
16 homogeneous population of osteoblasts according previously established methods<sup>1</sup>. Briefly, after  
17 dissection, trabecular bone chips were repeatedly washed with PBS at 37°C for 2 h in shaking conditions.  
18 Then, two distinct enzymatic digestions were repeated and performed at 37°C. The first digestion employed  
19 1mg/ml Trypsin from porcine pancreas ≥ 60 U/mg (SERVA Electrophoresis GmbH Heidelberg, DE)  
20 resuspended in PBS buffered at pH 7.2. After washing, trypsinized bone chips underwent to repeated  
21 digestions with a second type of protease employing 2.5 mg/ml Collagenase NB 4G Proved grade ≥  
22 0.18U/mg (SERVA Electrophoresis GmbH, Heidelberg, DE) in PBS buffer with Calcium and Magnesium. The  
23 supernatants from the 4th bone-chips digestion was collected and centrifuged at 310 RCF for 5'. The cell  
24 pellets were suspended in DMEM with 15% FBS, thus cells were then grown in low calcium media,  
25 supplemented with fetal bovine serum (10%; Intergen, Purchase, NY, USA), penicillin (50 U/ml), and  
26 streptomycin (50 pg/ml). When the cultures reached confluence in 3-5 weeks, the bone chips were  
27 removed and the cellular outgrowths treated with trypsin (0.05%) and EDTA (0.02%) to prepare single cell  
28 suspensions. All cells were incubated at 37°C and 5% CO<sub>2</sub>. Upon confluence, cells were detached from the  
29 plates by trypsinization, counted and subcultured at a density of 5000 cells/cm<sup>2</sup> for three passages.  
30 Osteoblast proliferation was compared between different tissue sources at passage one. Third passage cells  
31 were used in all other experiments.

32

33

34 **LC-MS/MS analysis.**

35 Peptide extracts were analyzed using a split-free nano-flow liquid chromatography system (EASY-nLC II,  
36 Proxeon, Odense, Denmark) coupled with a 3D-ion trap (model AmaZon ETD, Bruker Daltonik, Germany)  
37 equipped with an online ESI nanosprayer (the spray capillary was a fused silica capillary, 0.090 mm OD,  
38 0.020 mm ID) in positive ion mode. For all experiments, a 15  $\mu$ L sample volume was loaded by the  
39 autosampler onto a homemade 2 cm fused silica precolumn (100  $\mu$ m I.D.; 375  $\mu$ m O.D.; Reprosil C18-AQ, 5  
40  $\mu$ m, Dr. Maisch GmbH, Ammerbuch-Entringen, Germany). Sequential elution of peptides was accomplished  
41 using a flow rate of 300 nL/min and a linear gradient from Solution A (2% acetonitrile; 0.1% formic acid) to  
42 50% of Solution B (98% acetonitrile; 0.1% formic acid) in 40 min over the precolumn on-line with a  
43 homemade 15 cm resolving column (75  $\mu$ m I.D.; 375  $\mu$ m O.D.; Reprosil C18-AQ, 3  $\mu$ m, Dr. Maisch GmbH,  
44 Ammerbuch-Entringen, Germany). The acquisition parameters for the mass spectrometer were as follows:  
45 dry gas temperature, 220  $^{\circ}$ C; dry gas, 4.0 L/min; nebulizer gas, 10 psi; electrospray voltage, 4000 V; high-  
46 voltage end-plate offset, -200 V; capillary exit, 140 V; trap drive: 63.2; funnel 1 in 100 V out of 35 V and  
47 funnel 2 in 12 V out of 10 V; ICC target, 200,000 and maximum accumulation time, 50 ms. The sample was  
48 measured with the Enhanced Resolution Mode at 8100 m/z per second (which allows monoisotopic  
49 resolution up to four charge stages), scan range from m/z 300 to 1500, 5 spectra averaged, and rolling  
50 average of 1. The "Smart Decomposition" was set to "auto".

51 Label-free quantitative analyses were performed in biological triplicates by using the spectral counting  
52 method based on normalized exponentially modified protein abundance index (emPAI) as described by  
53 Shinoda et al<sup>2</sup>. In detail, for each protein the following percentage was calculated:

54  
55 Protein content (%) =  $\text{emPAI} / \sum \text{emPAI} \times 100$ .

56  
57 Statistically significant differences were identified by unpaired t-student test.

## 58 59 **UHPLC-HRMS**

60 Twenty microliters of samples were injected into an Ultra High-Performance Liquid Chromatography (UHPLC)  
61 system (Ultimate 3000, Thermo) and run on a Positive mode: Samples were loaded onto a Reprosil C18  
62 column (2.0 mm  $\times$  150 mm, 2.5  $\mu$ m — Dr Maisch, Germany) for metabolite separation. Chromatographic  
63 separations were achieved at a column temperature of 30  $^{\circ}$ C; and flow rate of 0.2 mL/min. For positive ion  
64 mode (+) MS analyses, a 0–100% linear gradient of solvent A (ddH<sub>2</sub>O, 0.1% formic acid) to B (acetonitrile,  
65 0.1% formic acid) was employed over 20 min, returning to 100% A in 2 min and a 6-min post-time solvent A  
66 hold. Acetonitrile, formic acid, and HPLC-grade water and standards ( $\geq$ 98% chemical purity) were  
67 purchased from Sigma Aldrich. The UHPLC system was coupled online with a mass spectrometer Q Exactive  
68 (Thermo) scanning in full MS mode (2  $\mu$ scans) at 70,000 resolution in the 67 to 1000 m/z range, target of

69 1'106 ions and a maximum ion injection time (IT) of 35 ms 3.8 kV spray voltage, 40 sheath gas, and 25  
70 auxiliary gas, operated in positive ion mode. Source ionization parameters were: spray voltage, 3.8 kV;  
71 capillary temperature, 300 ° C; and S-Lens level, 45. Calibration was performed before each analysis against  
72 positive or negative ion mode calibration mixes (Piercenet, Thermo Fisher, Rockford, IL) to ensure sub ppm  
73 error of the intact mass. Metabolite assignments were performed using computer software (Maven,18  
74 Princeton, NJ), upon conversion of raw files into *mzXML* format through MassMatrix (Cleveland, OH).

75

## 76 REFERENCE

- 77 1. Siggelkow, H. *et al.* Development of the osteoblast phenotype in primary human osteoblasts in  
78 culture: comparison with rat calvarial cells in osteoblast differentiation. *J Cell Biochem.* **75**(1), 22-  
79 35 (1999).
- 80 2. Shinoda, K., Tomita, M. & Ishihama, Y. emPAI Calc—for the estimation of protein abundance from  
81 large-scale identification data by liquid chromatography-tandem mass spectrometry.  
82 *Bioinformatics.* **26**, 576–577 (2010).

83

84 **Supplementary Figures**

A  
85  
A  
86

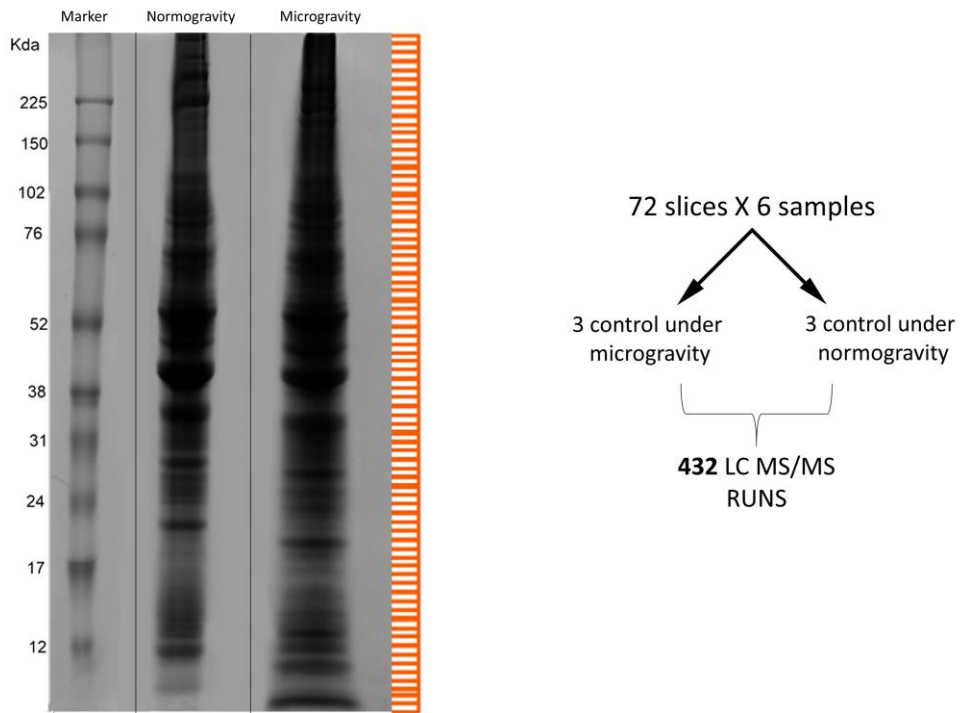

88

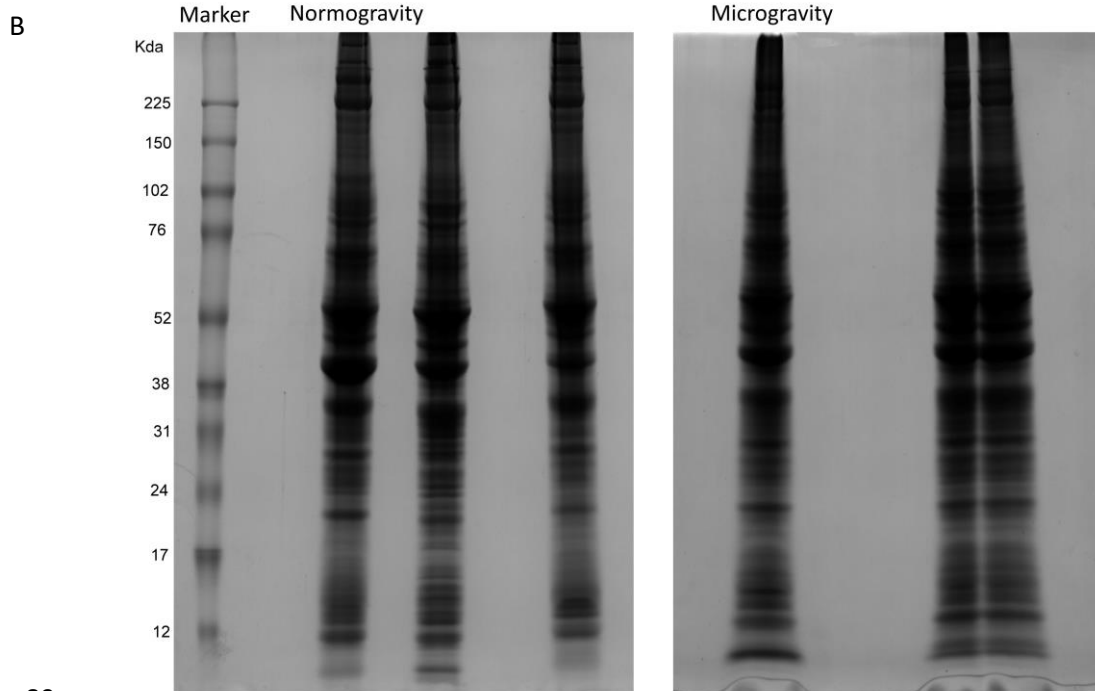

90 **Fig. S1 One dimensional SDS-PAGE (16–8% linear gradient polyacrylamide gel).** A) A 150 µg aliquot of  
 91 human osteoblast proteome was loaded per lane. Three biological replicates per condition were  
 92 analyzed. The gels were stained with blue-Comassie. The vertical line indicates where gel- images was  
 93 cropped; the two original images are reported on panel B.

94

95

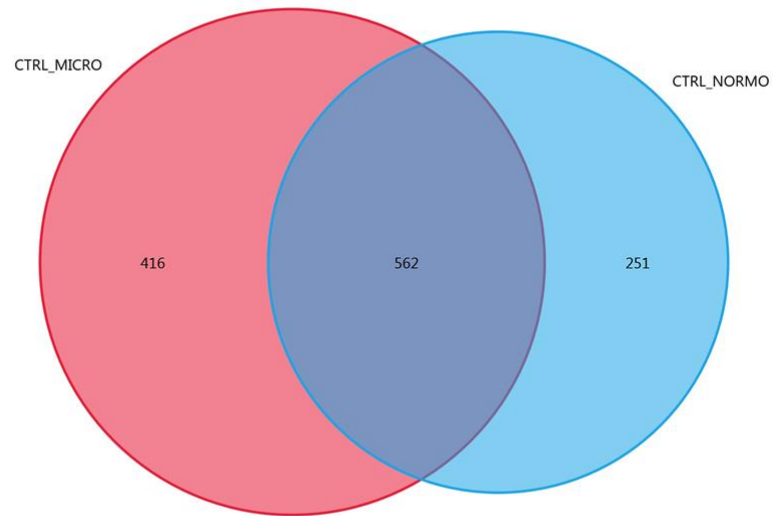

96  
97 **Fig. S2. Venn Diagram.** Depicting the comparative protein profiling of human osteoblast under  
98 normogravity and under microgravity it was revealed that 251 proteins were uniquely detected in  
99 normogravity, 416 were detected exclusively in microgravity and 562 were shared.

### CELLULAR COMPONENT

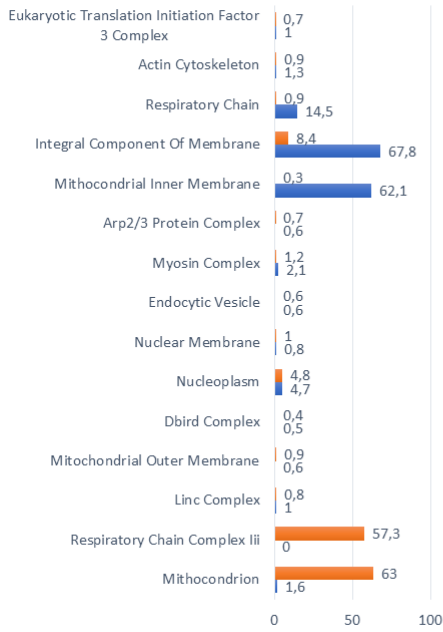

### MOLECULAR FUNCTION

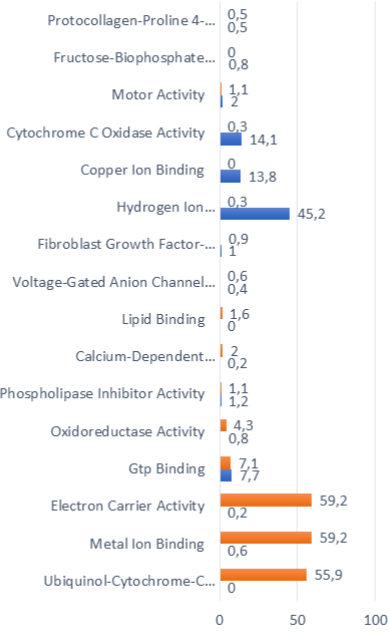

### BIOLOGICAL PROCESS

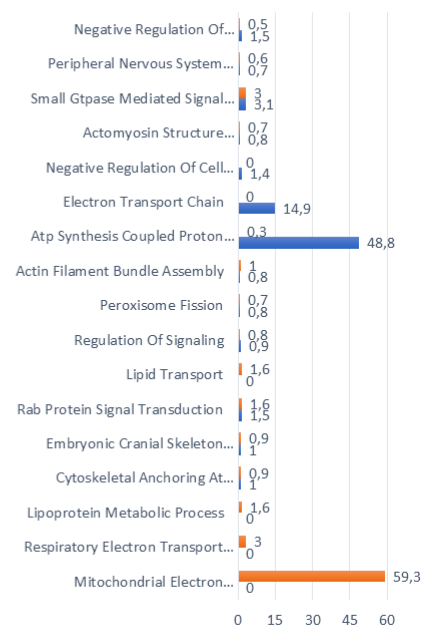

100

101 **Fig. S3. Functional enrichment analysis of hpOB under Normogravity and Microgravity using FunRich.**  
 102 Bioinformatics Gene Ontology-based classification of proteomes according to three categories: cellular  
 103 components (A), molecular function (B), and biological processes (C).

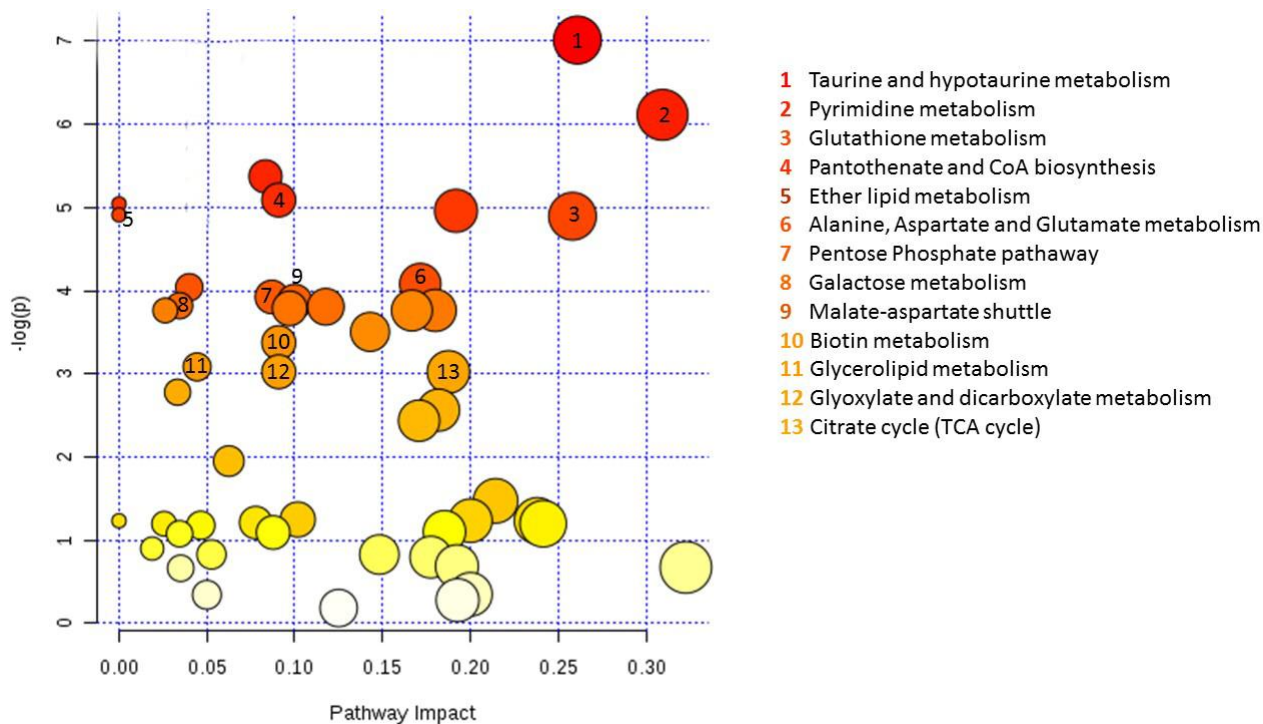

104

105 **Fig. S4. Metabolic Set Enrichment Analysis. We analyzed the MetPA plot using Metaboanalyst software.**

106 Color intensity (light blue means the metabolite are is not in your data but used as background for  
 107 enrichment analysis; grey means the metabolite is not in your data and also excluded from enrichment;  
 108 other colors varying from yellow to red reflects increasing statistical significance, while circle diameter  
 109 covaries with pathway impact. The graph was obtained plotting on the y-axis the  $-\log$  of p-values from  
 110 pathway enrichment analysis and on the x-axis the pathway impact values derived from pathway topology  
 111 analysis.

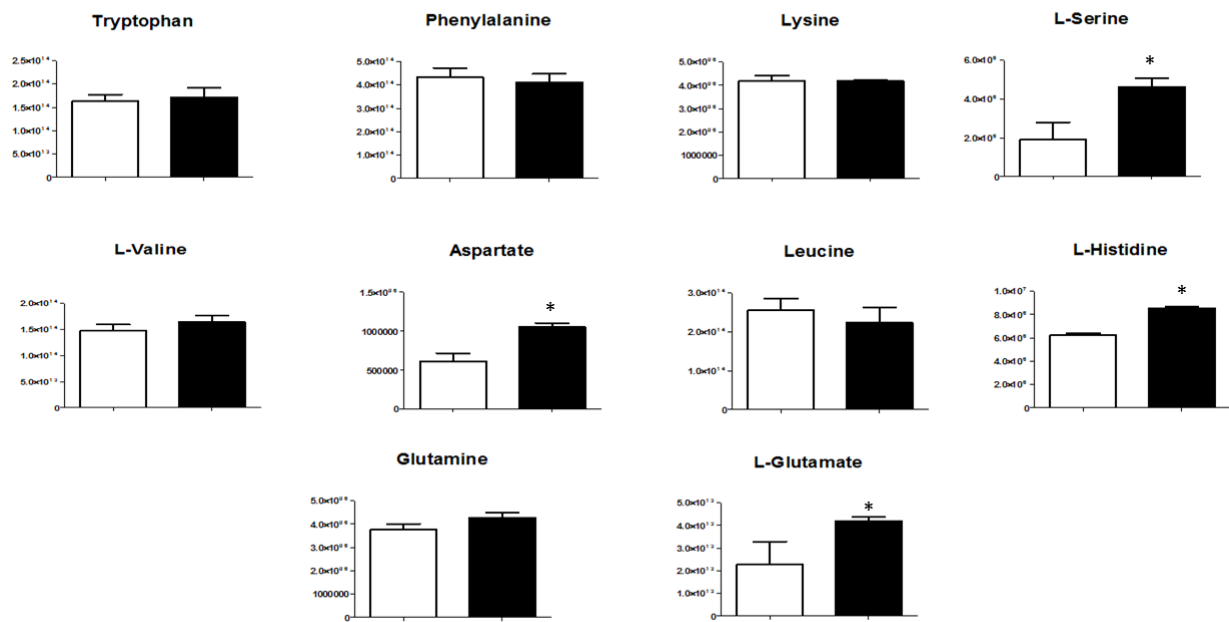

112

113 **Fig. S5. Amino acids.** The columns white represented mean ± SD (n=9) of metabolite concentration in  
 114 normogravity, the column in black represented mean ± SD (n=9) of metabolite concentration in  
 115 microgravity. Statistical significance was indicated with \**p* < 0.05; \*\**p* < 0.01; \*\*\**p* < 0.001.
